# Supplementary material for: Interactive Effects of AMF Inoculation and Leaf Leachate on the Growth and Reproduction of Anthemis cotula L.: Implications for its Invasion in the Himalaya
Source: Research Square preprint supplement (doi:10.21203/rs.3.rs-7110437/v1), 2025-07-28
Supplement: Supplementary file 1 [file 39e6b9a012c85a0976973eba.docx]

**Table S1: Greenhouse experiment setup showing different treatments, treatment combinations and the rationale for different treatments.**

| **S.no** | **Treatment** | **Concentration of Leaf leachate (AL) in mg/ml** | **Activated charcoal (AC) in g/300g soil** | **Rationale** |
| --- | --- | --- | --- | --- |
|  |  |  |  | Activated charcoal was used to absorb the leaf leachate, so that the effect of allelopathy would be neutralized. |
| 1 | AC | - | 3 |
| 2 | AL1 | 5 | - | Leaf leachate was added to see the allelopathic effect |
| 3 | AL2 | 10 | - |
|  |  |  |  | To discern the effect of increasing leaf leachates at a constant activated charcoal concentration |
| 4 | AC+AL1 | 5 | 3 |
| 5 | AC+AL2 | 10 | 3 |
|  |  |  |  |
| 6 | AMF present | - | - | This comparison will establish insights into the role of AMF |
| 7 | AMF absent (Untreated control) | - | - |
|  |  |  |  | To evaluate the effect of two different leaf leachate concentrations at a constant activated charcoal concentrations in presence of AMF. |
| 8 | AMF+AC+AL1 | 5 | 3 |
| 9 | AMF+AC+AL2 | 10 | 3 |
|  |  |  |  | To understand the influence of AMF under varying leaf leachate concentrations |
| 10 | AMF+AC | - | 3 |
| 11 | AMF+AL1 | 5 | - |
| 12 | AMF+AL2 | 10 | - |

AL1= leaf leachate concentration 1; AL2= leaf leachate concentration 2; AMF= Arbuscular Mycorrhizal Fungi consortium; AC= Activated Charcoal concentration.

**Table S2. Results of two-way ANOVA analyzing the effects of treatments, time, and their interaction on the physiological and reproductive parameters of *Anthemis cotula*.**

| **Height (cm)** | | | | | | | | |
| --- | --- | --- | --- | --- | --- | --- | --- | --- |
| **Term** | | | **Df** | | **Sum Sq** | **Mean Sq** | **F value** | **Pr(>F)** |
| Treatments | | | 11 | | 14.5885 | 1.3262 | 18.0618 | 0.0000 |
| Time | | | 4 | | 532.4025 | 133.1006 | 1812.6903 | 0.0000 |
| Treatments:Time | | | 44 | | 9.7400 | 0.2214 | 3.0147 | 0.0000 |
| Residuals | | | 540 | | 39.6506 | 0.0734 | -- | -- |
| **Root dry matter (g/plant)** | | | | | | | | |
| Treatments | | | 11 | | 54.5791 | 4.9617 | 36.8599 | 0.0000 |
| Time | | | 4 | | 431.7660 | 107.9415 | 801.8790 | 0.0000 |
| Treatments:Time | | | 44 | | 39.3831 | 0.8951 | 6.6493 | 0.0000 |
| Residuals | | | 540 | | 72.6898 | 0.1346 | -- | -- |
| **Shoot dry matter (g/plant)** | | | | | | | | |
| Treatments | | 11 | | | 63.6407 | 5.7855 | 46.1838 | 0.0000 |
| Time | | 4 | | | 436.1729 | 109.0432 | 870.4539 | 0.0000 |
| Treatments:Time | | 44 | | | 31.2015 | 0.7091 | 5.6607 | 0.0000 |
| Residuals | | 540 | | | 67.6467 | 0.1253 | -- | -- |
| **Number of lateral branches/plant** | | | | | | | | |
| Treatments | 11 | | | 129.7403 | | 11.7946 | 100.5534 | 0.0000 |
| Time | 4 | | | 391.8354 | | 97.9588 | 835.1377 | 0.0000 |
| Treatments:Time | 44 | | | 14.0842 | | 0.3201 | 2.7289 | 0.0000 |
| Residuals | 540 | | | 63.3402 | | 0.1173 | -- | -- |

**Table S3. Results of one-way ANOVA analyzing the effects of treatments on the physiological and reproductive parameters of *Anthemis cotula*.**

| **Photosynthesis rate (µmolCO2 m–2 s–1)** | | | | | | |
| --- | --- | --- | --- | --- | --- | --- |
| Term | **Df** | **Sum Sq** | **Mean Sq** | **F value** | **Pr(>F)** | |
| Treatments | 11 | 68.3876 | 6.2171 | 13.2664 | 0.0000 | |
| Residuals | 108 | 50.6124 | 0.4686 | -- | -- | |
| **Stomatal conductance (mmol H2O m–2s–1)** | | | | | | |
| Treatments | 11 | 56.9883 | 5.1808 | 9.0228 | 0.0000 | |
| Residuals | 108 | 62.0117 | 0.5742 | -- | -- | |
| **Internal CO2 concentration (µmol/mol)** | | | | | | |
| Treatments | 11 | 74.9686 | 6.8153 | 16.8231 | 0.0000 | |
| Residuals | 108 | 43.7527 | 0.4051 | -- | -- | |
| **Transpiration rate (mmol H2O m–2s–1)** | | | | | | |
| Treatments | 11 | 48.3230 | 4.3930 | 6.7128 | 0.0000 | |
| Residuals | 108 | 70.6770 | 0.6544 | -- | -- | |
| **Number of floral buds/plant** | | | | | |
| Treatments | 11 | 88.3387 | 8.0308 | 28.2873 | 0.0000 |
| Residuals | 108 | 30.6613 | 0.2839 | -- | -- |
| **P content (mg·g⁻¹)** | | | | | |
| Treatment | 11 | 32.4457 | 2.9496 | 27.7139 | 0.0000 |
| Residuals | 24 | 2.5543 | 0.1064 | -- | -- |
